# Supplementary material
Source: MDPI journal article supplement (https://www.mdpi.com/search?q=pharmaceuticals-04-01503)
Supplement: s001 [file pharmaceuticals-10602-supplementary-videos legends.docx]

**Video Legends**

**Videos showing real-time translocation of PKCβII-EGFP in the same single cell body of DRG neuron**

Real-time translocation of PKCβII-EGFP in response to 100 nM capsaicin **(Capsaicin response in DRG neuron)** and 100 nM PMA **(PMA response in DRG neuron)** in the presence of 2 mM extracellular Ca2+. 100 nM capsaicin induced reversible translocation; 100 nM PMA induced a sustained translocation. [Note: The video files have been edited from their original form to show
real-time translocation kinetics representative of response to individual stimuli].

**Videos showing real-time translocation of PKCβII-EGFP in the same single cell body of CHO cell transiently co-transfected with PKCβII-EGFP and TRPV1**

Real-time translocation of PKCβII-EGFP in response to 100 nM capsaicin **(Capsaicin response in CHO cell)** and 100 nM PMA **(PMA response in CHO cell)** in the presence of 2 mM extracellular Ca2+. 100 nM capsaicin induced reversible translocation; 100 nM PMA induced a sustained translocation. [Note: The video files have been edited from their original form to show real-time translocation kinetics representative of response to individual stimuli].
